# Supplementary material
Source: Springer Nature journal article supplement (https://www.springermedizin.de/resource/supplementary/13063_2011_625_MOESM4_ESM.pdf/9618900)
Supplement: MOESM4 [file 9618900]

1029 Citations identified using search terms

1014 Citations excluded based on  
title and abstract

15 Potentially relevant articles

4 References obtained from  
manual searches

19 Articles included in review

7 Excluded  
1 Non-randomized  
2 Non-recent myocardial infarction  
1 time post myocardial infarction not reported  
3 No complete ejection fraction data or data not extractable

12 Articles included in review
